# Supplementary material for: Tracking WNV transmission with a combined dog and wild boar surveillance system
Source: Springer Nature journal article supplement (doi:10.1038/s41598-025-89561-5), 2025-04-01
Supplement: MOESM1 [file 41598_2025_89561_MOESM1_ESM.pdf]

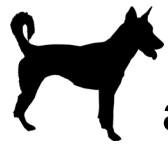**a**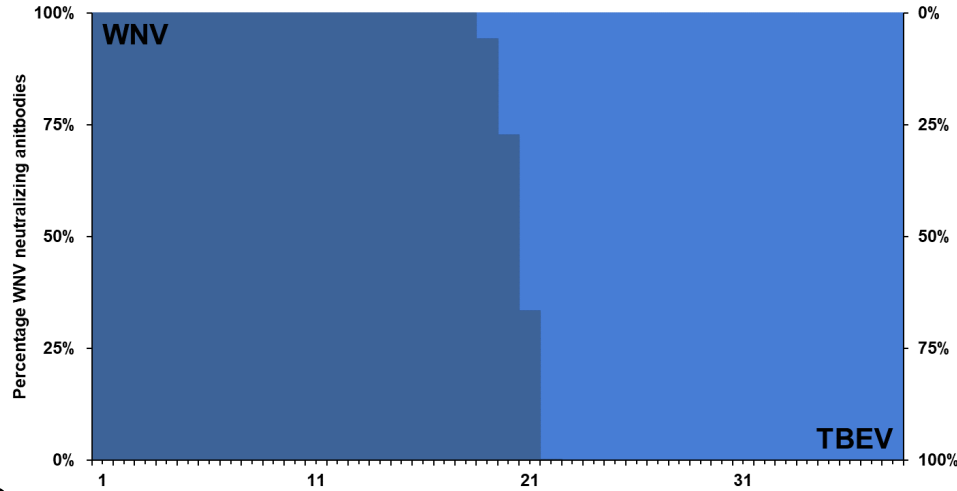**b**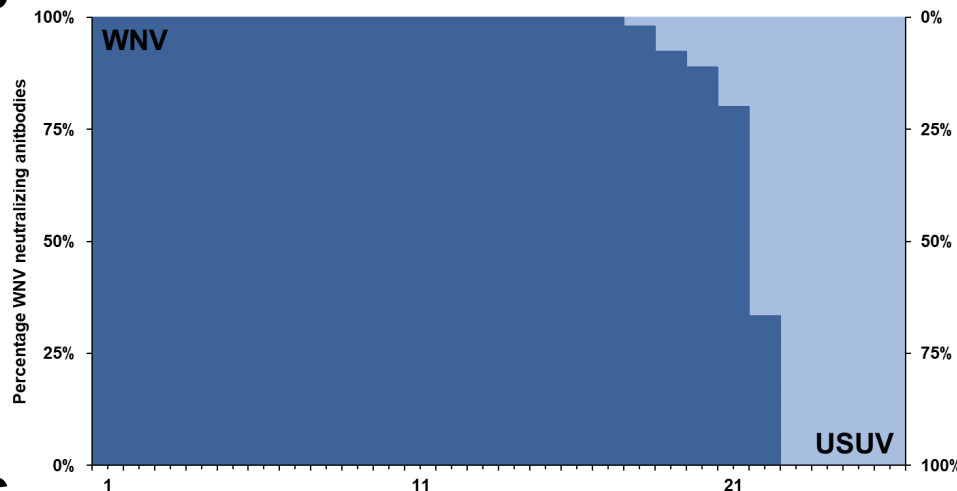**c**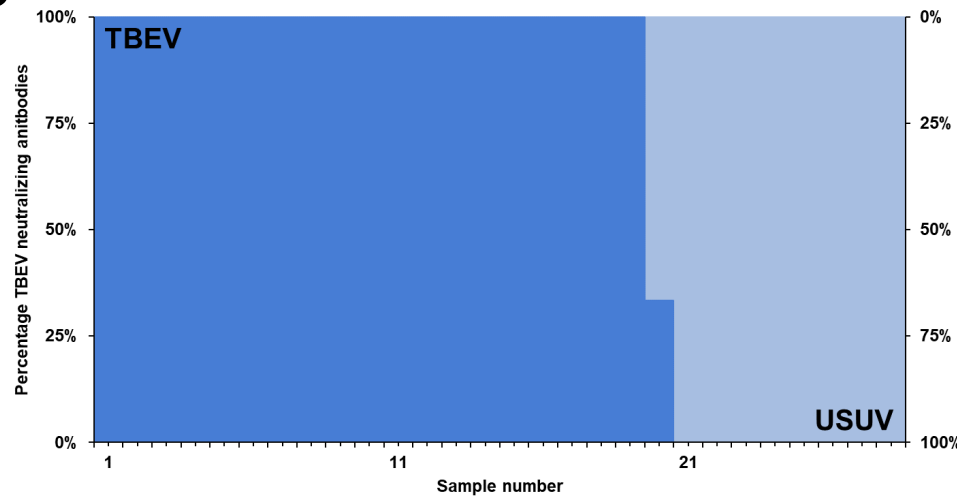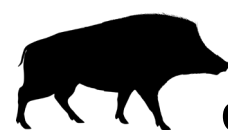**d**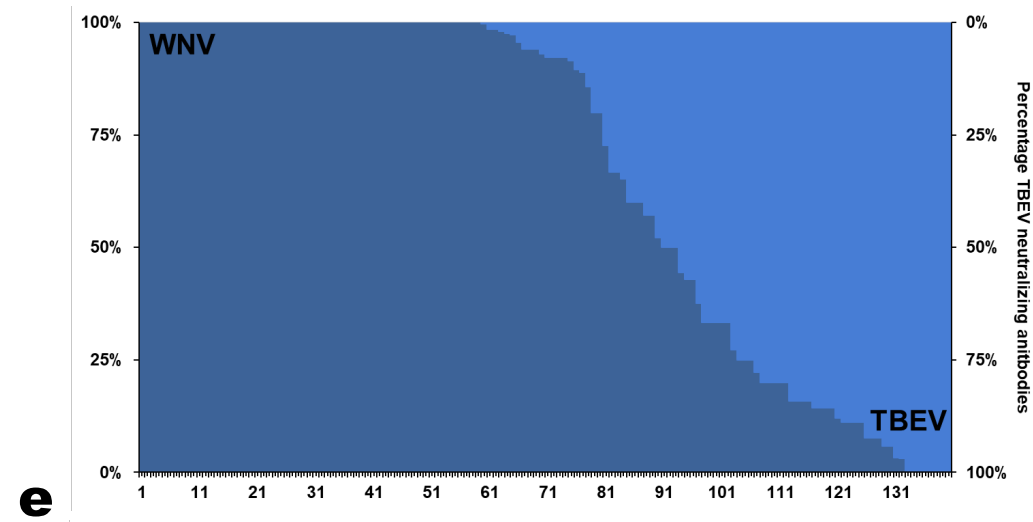**e**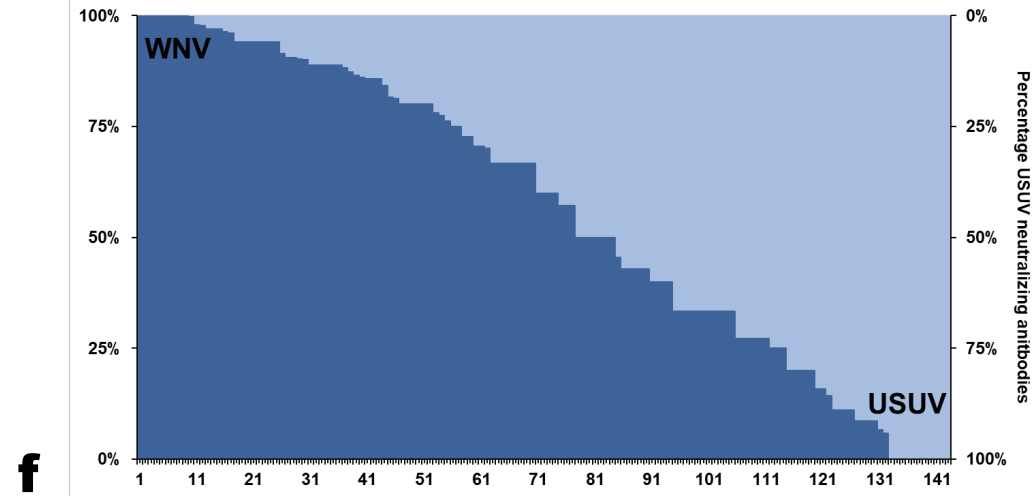**f**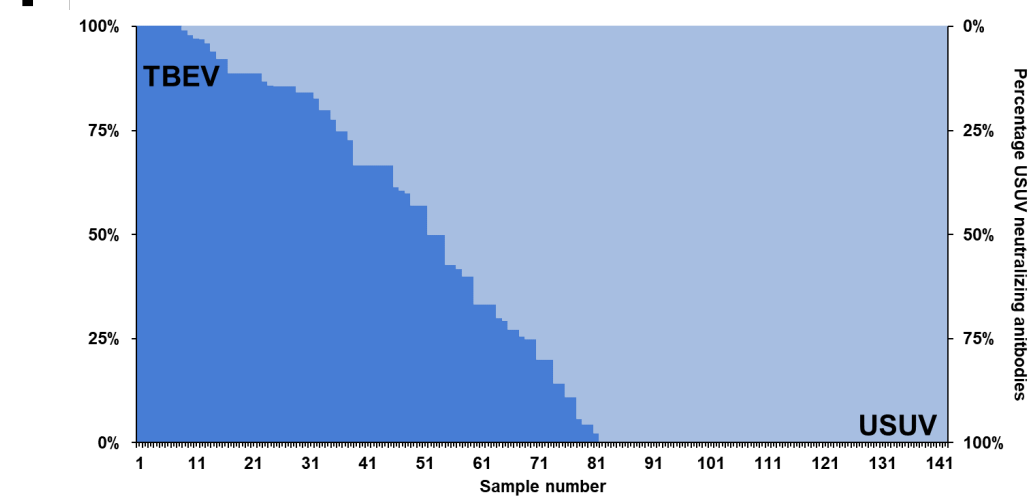

**Figure S1.** Bar charts depicting the percentage of neutralizing antibodies against two specific flaviviruses (WNV, TBEV, or USUV) in relation to one another for the dog (a-c) and the wild boar samples (d-f).
